# Supplementary material
Source: PubMed Central journal article supplement (PMC4753540)
Supplement: ml5b00375_si_001.pdf [file ml5b00375_si_001.pdf]

Supporting information

# Beyond PAINs: Chemotype Sensitivity of Protein Methyltransferases in Screens

Cen Gao,<sup>†</sup> Brandon Margolis,<sup>†</sup> John M. Strelow,<sup>†</sup> Lewis R. Vidler,<sup>‡</sup> Mary M. Mader<sup>†\*</sup>

<sup>†</sup>Lilly Research Laboratories, Eli Lilly and Company, Lilly Corporate Center, Indianapolis, Indiana 46285, United States

<sup>‡</sup>Research and Development, Eli Lilly and Company Ltd., Sunninghill Road, Windlesham, Surrey GU20 6PH, United Kingdom

\*Corresponding author: [mader@lilly.com](mailto:mader@lilly.com)

Figure S1 Statistics of number of compounds screened in these 13 assays and number of times each compounds screened.

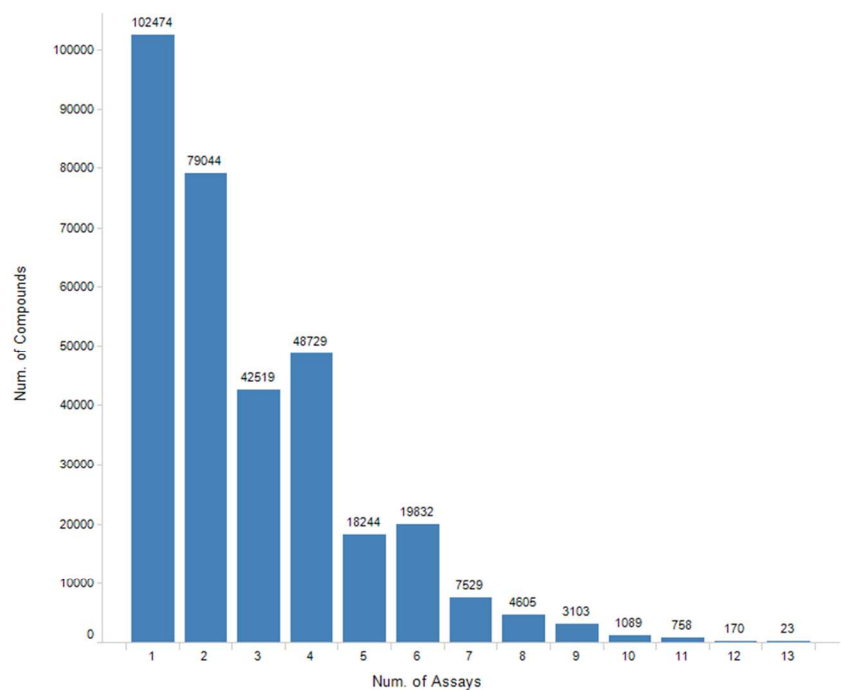

Figure S2 Number of times compounds are active. Active is defined as > 50% inhibition in single point assay.

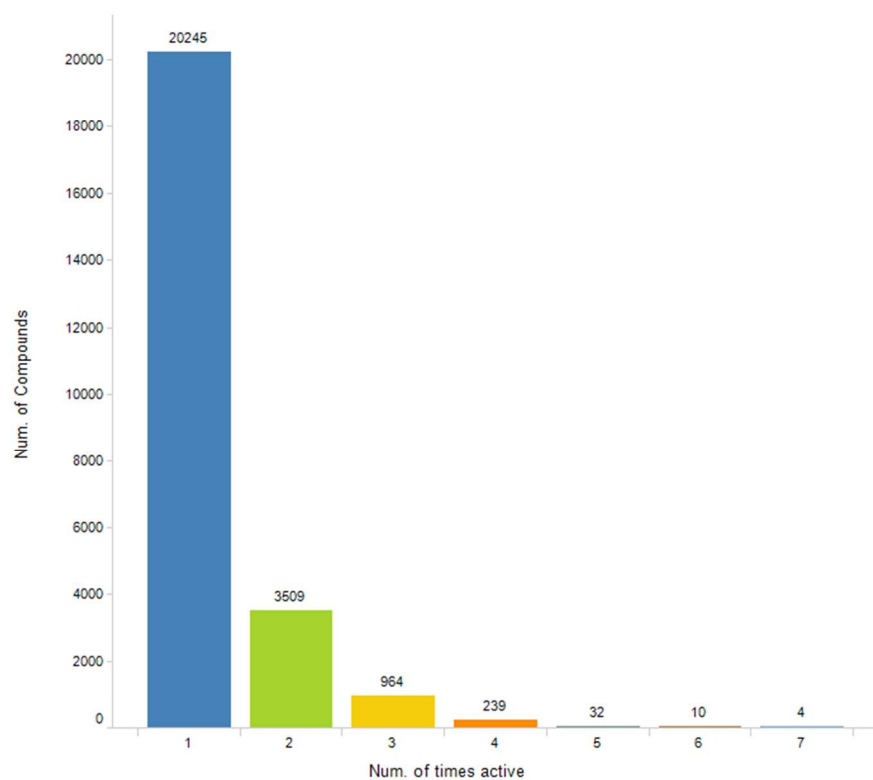

Table S1. Physicochemical properties of compounds screened in different assays.

| Assay        | Molecular Weight | AlogP   | Hbond Acceptor | Hbond Donor | Rotatable bonds | PSA (Å) |
|--------------|------------------|---------|----------------|-------------|-----------------|---------|
| EZH2 (w.t.)  | 369±54           | 2.9±1.3 | 3.6±1.4        | 1.0±0.9     | 5±2             | 84±29   |
| EZH2 (A677G) | 369±53           | 3.0±1.2 | 3.5±1.4        | 1.0±0.8     | 5±2             | 83±28   |
| EZH2 (Y641N) | 367±54           | 3.0±1.2 | 3.5±1.4        | 1.0±0.8     | 5±2             | 83±28   |
| PRMT5        | 339±70           | 3.0±1.6 | 3.1±1.5        | 0.9±0.9     | 5±2             | 75±32   |
| PRMT6        | 392±33           | 3.0±1.1 | 3.8±1.4        | 1.1±0.8     | 6±2             | 89±28   |
| SETD8        | 358±69           | 3.1±1.5 | 3.3±1.5        | 1.0±0.9     | 5±2             | 78±31   |
| SUV420H1     | 366±56           | 2.7±1.4 | 3.8±1.6        | 1.2±1.0     | 5±2             | 89±32   |
| SMYD2        | 338±71           | 3.0±1.6 | 3.1±1.5        | 0.9±0.9     | 5±2             | 75±32   |
| NHR A        | 361±90           | 3.5±2.0 | 2.9±1.5        | 0.8±0.9     | 5±3             | 79±33   |
| PDE A        | 333±93           | 3.2±1.7 | 2.9±1.6        | 0.9±0.9     | 4±3             | 72±34   |
| PDE B        | 356±83           | 3.3±1.6 | 3.0±1.5        | 1.0±0.9     | 5±3             | 74±33   |
| PDE C        | 333±93           | 3.2±1.7 | 2.9±1.6        | 0.9±0.9     | 4±3             | 72±34   |
| PDE D        | 358±83           | 3.3±1.6 | 3.1±1.5        | 1.0±0.9     | 5±3             | 76±33   |

Table S2. Lilly historical assay profile for 285 frequent hitters from current analysis

| Compound ID | Lilly historical  |                   |                            | Current analysis  |                   |
|-------------|-------------------|-------------------|----------------------------|-------------------|-------------------|
|             | # of assay tested | # of assay active | # of protein family active | # of assay tested | # of assay active |
| 1           | 111               | 0                 | 0                          | 4                 | 4                 |
| 2           | 185               | 1                 | 1                          | 4                 | 4                 |
| 3           | 45                | 1                 | 1                          | 4                 | 4                 |
| 4           | 56                | 2                 | 1                          | 4                 | 4                 |
| 5           | 131               | 2                 | 1                          | 4                 | 4                 |
| 6           | 99                | 2                 | 1                          | 4                 | 4                 |
| 7           | 51                | 2                 | 2                          | 4                 | 4                 |
| 8           | 60                | 2                 | 1                          | 4                 | 4                 |
| 9           | 91                | 3                 | 1                          | 4                 | 4                 |
| 10          | 142               | 4                 | 3                          | 4                 | 4                 |
| 11          | 47                | 4                 | 2                          | 4                 | 4                 |
| 12          | 157               | 5                 | 2                          | 4                 | 4                 |
| 13          | 51                | 5                 | 3                          | 4                 | 4                 |
| 14          | 105               | 5                 | 2                          | 4                 | 4                 |
| 15          | 461               | 6                 | 3                          | 4                 | 4                 |
| 16          | 284               | 6                 | 3                          | 4                 | 4                 |
| 17          | 58                | 7                 | 2                          | 4                 | 4                 |
| 18          | 62                | 7                 | 4                          | 4                 | 4                 |
| 19          | 109               | 7                 | 2                          | 4                 | 4                 |

|    |     |    |   |   |   |
|----|-----|----|---|---|---|
| 20 | 302 | 8  | 2 | 4 | 4 |
| 21 | 207 | 8  | 2 | 4 | 4 |
| 22 | 111 | 8  | 3 | 4 | 4 |
| 23 | 62  | 8  | 2 | 4 | 4 |
| 24 | 338 | 9  | 5 | 4 | 4 |
| 25 | 352 | 10 | 4 | 4 | 4 |
| 26 | 364 | 10 | 4 | 4 | 4 |
| 27 | 137 | 10 | 3 | 4 | 4 |
| 28 | 103 | 10 | 5 | 4 | 4 |
| 29 | 106 | 10 | 4 | 4 | 4 |
| 30 | 145 | 11 | 2 | 4 | 4 |
| 31 | 338 | 12 | 4 | 4 | 4 |
| 32 | 151 | 12 | 4 | 4 | 4 |
| 33 | 267 | 12 | 6 | 4 | 4 |
| 34 | 516 | 12 | 5 | 4 | 4 |
| 35 | 74  | 12 | 3 | 4 | 4 |
| 36 | 472 | 13 | 4 | 4 | 4 |
| 37 | 76  | 13 | 2 | 4 | 4 |
| 38 | 115 | 14 | 2 | 4 | 4 |
| 39 | 496 | 14 | 5 | 4 | 4 |
| 40 | 441 | 14 | 4 | 4 | 4 |
| 41 | 488 | 14 | 6 | 4 | 4 |
| 42 | 365 | 14 | 6 | 4 | 4 |
| 43 | 622 | 15 | 5 | 4 | 4 |
| 44 | 523 | 15 | 4 | 4 | 4 |
| 45 | 78  | 15 | 4 | 4 | 4 |
| 46 | 91  | 15 | 2 | 4 | 4 |
| 47 | 387 | 16 | 3 | 4 | 4 |
| 48 | 359 | 16 | 5 | 4 | 4 |
| 49 | 78  | 16 | 4 | 4 | 4 |
| 50 | 453 | 17 | 5 | 4 | 4 |
| 51 | 428 | 18 | 4 | 4 | 4 |
| 52 | 185 | 18 | 3 | 4 | 4 |
| 53 | 828 | 20 | 6 | 4 | 4 |
| 54 | 376 | 20 | 6 | 4 | 4 |
| 55 | 365 | 20 | 5 | 4 | 4 |
| 56 | 409 | 20 | 6 | 4 | 4 |
| 57 | 361 | 20 | 4 | 4 | 4 |
| 58 | 351 | 20 | 6 | 4 | 4 |
| 59 | 519 | 21 | 7 | 4 | 4 |
| 60 | 133 | 22 | 4 | 4 | 4 |

|     |     |    |   |   |   |
|-----|-----|----|---|---|---|
| 61  | 352 | 23 | 5 | 4 | 4 |
| 62  | 344 | 23 | 5 | 4 | 4 |
| 63  | 463 | 23 | 7 | 4 | 4 |
| 64  | 455 | 23 | 6 | 4 | 4 |
| 65  | 447 | 23 | 4 | 4 | 4 |
| 66  | 177 | 24 | 6 | 4 | 4 |
| 67  | 522 | 24 | 6 | 4 | 4 |
| 68  | 366 | 24 | 7 | 4 | 4 |
| 69  | 78  | 24 | 1 | 4 | 4 |
| 70  | 594 | 25 | 5 | 4 | 4 |
| 71  | 396 | 25 | 8 | 4 | 4 |
| 72  | 393 | 26 | 9 | 4 | 4 |
| 73  | 454 | 27 | 6 | 4 | 4 |
| 74  | 428 | 27 | 7 | 4 | 4 |
| 75  | 453 | 27 | 5 | 4 | 4 |
| 76  | 90  | 27 | 6 | 4 | 4 |
| 77  | 495 | 28 | 7 | 4 | 4 |
| 78  | 233 | 30 | 3 | 4 | 4 |
| 79  | 408 | 30 | 7 | 4 | 4 |
| 80  | 452 | 30 | 6 | 4 | 4 |
| 81  | 162 | 30 | 3 | 4 | 4 |
| 82  | 386 | 31 | 8 | 4 | 4 |
| 83  | 475 | 31 | 6 | 4 | 4 |
| 84  | 182 | 31 | 7 | 4 | 4 |
| 85  | 519 | 35 | 6 | 4 | 4 |
| 86  | 462 | 38 | 6 | 4 | 4 |
| 87  | 507 | 39 | 5 | 4 | 4 |
| 88  | 844 | 40 | 4 | 4 | 4 |
| 89  | 503 | 40 | 5 | 4 | 4 |
| 90  | 462 | 40 | 6 | 4 | 4 |
| 91  | 258 | 42 | 8 | 4 | 4 |
| 92  | 445 | 43 | 9 | 4 | 4 |
| 93  | 305 | 44 | 4 | 4 | 4 |
| 94  | 438 | 45 | 9 | 4 | 4 |
| 95  | 503 | 49 | 8 | 4 | 4 |
| 96  | 289 | 49 | 3 | 4 | 4 |
| 97  | 362 | 51 | 9 | 4 | 4 |
| 98  | 472 | 54 | 7 | 4 | 4 |
| 99  | 398 | 55 | 8 | 4 | 4 |
| 100 | 480 | 56 | 8 | 4 | 4 |
| 101 | 385 | 56 | 8 | 4 | 4 |

|     |     |     |    |   |   |
|-----|-----|-----|----|---|---|
| 102 | 544 | 75  | 7  | 4 | 4 |
| 103 | 645 | 190 | 9  | 4 | 4 |
| 104 | 611 | 217 | 2  | 4 | 4 |
| 105 | 118 | 3   | 2  | 5 | 5 |
| 106 | 150 | 4   | 3  | 5 | 4 |
| 107 | 171 | 4   | 3  | 5 | 4 |
| 108 | 119 | 5   | 2  | 5 | 4 |
| 109 | 183 | 5   | 3  | 5 | 4 |
| 110 | 167 | 7   | 2  | 5 | 5 |
| 111 | 396 | 8   | 5  | 5 | 4 |
| 112 | 208 | 10  | 6  | 5 | 4 |
| 113 | 114 | 10  | 2  | 5 | 4 |
| 114 | 328 | 14  | 3  | 5 | 4 |
| 115 | 596 | 17  | 7  | 5 | 4 |
| 116 | 551 | 17  | 4  | 5 | 4 |
| 117 | 402 | 19  | 6  | 5 | 4 |
| 118 | 387 | 19  | 8  | 5 | 4 |
| 119 | 311 | 20  | 6  | 5 | 4 |
| 120 | 209 | 21  | 2  | 5 | 4 |
| 121 | 363 | 22  | 7  | 5 | 4 |
| 122 | 284 | 23  | 5  | 5 | 4 |
| 123 | 380 | 24  | 6  | 5 | 4 |
| 124 | 461 | 24  | 3  | 5 | 5 |
| 125 | 495 | 25  | 7  | 5 | 4 |
| 126 | 335 | 26  | 7  | 5 | 4 |
| 127 | 518 | 28  | 4  | 5 | 4 |
| 128 | 278 | 29  | 7  | 5 | 4 |
| 129 | 366 | 33  | 6  | 5 | 4 |
| 130 | 494 | 36  | 8  | 5 | 4 |
| 131 | 361 | 37  | 9  | 5 | 4 |
| 132 | 685 | 38  | 5  | 5 | 4 |
| 133 | 676 | 42  | 9  | 5 | 4 |
| 134 | 474 | 44  | 9  | 5 | 4 |
| 135 | 292 | 47  | 5  | 5 | 5 |
| 136 | 615 | 48  | 7  | 5 | 4 |
| 137 | 450 | 48  | 6  | 5 | 4 |
| 138 | 315 | 49  | 2  | 5 | 4 |
| 139 | 460 | 66  | 11 | 5 | 5 |
| 140 | 430 | 71  | 9  | 5 | 4 |
| 141 | 439 | 82  | 8  | 5 | 4 |
| 142 | 154 | 0   | 0  | 6 | 4 |

|     |     |    |   |   |   |
|-----|-----|----|---|---|---|
| 143 | 266 | 1  | 1 | 6 | 4 |
| 144 | 189 | 1  | 1 | 6 | 4 |
| 145 | 213 | 1  | 1 | 6 | 5 |
| 146 | 144 | 1  | 1 | 6 | 4 |
| 147 | 209 | 2  | 1 | 6 | 5 |
| 148 | 152 | 2  | 2 | 6 | 4 |
| 149 | 133 | 2  | 1 | 6 | 4 |
| 150 | 301 | 3  | 2 | 6 | 5 |
| 151 | 173 | 3  | 2 | 6 | 4 |
| 152 | 238 | 4  | 1 | 6 | 5 |
| 153 | 166 | 4  | 2 | 6 | 4 |
| 154 | 147 | 4  | 2 | 6 | 4 |
| 155 | 251 | 5  | 3 | 6 | 4 |
| 156 | 172 | 5  | 2 | 6 | 4 |
| 157 | 157 | 5  | 2 | 6 | 4 |
| 158 | 293 | 6  | 4 | 6 | 4 |
| 159 | 103 | 6  | 2 | 6 | 4 |
| 160 | 791 | 7  | 3 | 6 | 4 |
| 161 | 307 | 7  | 3 | 6 | 4 |
| 162 | 179 | 7  | 4 | 6 | 4 |
| 163 | 211 | 7  | 2 | 6 | 6 |
| 164 | 196 | 7  | 4 | 6 | 5 |
| 165 | 169 | 8  | 2 | 6 | 5 |
| 166 | 360 | 10 | 4 | 6 | 6 |
| 167 | 179 | 10 | 2 | 6 | 4 |
| 168 | 337 | 11 | 6 | 6 | 4 |
| 169 | 186 | 12 | 2 | 6 | 4 |
| 170 | 203 | 12 | 5 | 6 | 4 |
| 171 | 142 | 12 | 3 | 6 | 4 |
| 172 | 235 | 13 | 6 | 6 | 4 |
| 173 | 216 | 14 | 4 | 6 | 4 |
| 174 | 291 | 15 | 3 | 6 | 4 |
| 175 | 508 | 15 | 6 | 6 | 4 |
| 176 | 218 | 16 | 5 | 6 | 5 |
| 177 | 573 | 17 | 4 | 6 | 4 |
| 178 | 304 | 18 | 4 | 6 | 4 |
| 179 | 544 | 20 | 6 | 6 | 4 |
| 180 | 590 | 20 | 8 | 6 | 4 |
| 181 | 309 | 20 | 4 | 6 | 4 |
| 182 | 370 | 21 | 5 | 6 | 4 |
| 183 | 424 | 22 | 6 | 6 | 5 |

|     |     |     |   |   |   |
|-----|-----|-----|---|---|---|
| 184 | 266 | 22  | 6 | 6 | 4 |
| 185 | 455 | 25  | 5 | 6 | 4 |
| 186 | 770 | 30  | 6 | 6 | 4 |
| 187 | 306 | 31  | 8 | 6 | 4 |
| 188 | 547 | 31  | 6 | 6 | 5 |
| 189 | 241 | 31  | 7 | 6 | 5 |
| 190 | 389 | 33  | 5 | 6 | 4 |
| 191 | 352 | 34  | 4 | 6 | 5 |
| 192 | 483 | 36  | 8 | 6 | 4 |
| 193 | 246 | 45  | 3 | 6 | 4 |
| 194 | 318 | 47  | 8 | 6 | 4 |
| 195 | 605 | 49  | 7 | 6 | 4 |
| 196 | 474 | 50  | 9 | 6 | 4 |
| 197 | 689 | 50  | 7 | 6 | 6 |
| 198 | 862 | 66  | 7 | 6 | 4 |
| 199 | 747 | 100 | 8 | 6 | 4 |
| 200 | 151 | 1   | 1 | 7 | 4 |
| 201 | 301 | 2   | 2 | 7 | 4 |
| 202 | 55  | 6   | 1 | 7 | 5 |
| 203 | 347 | 7   | 5 | 7 | 4 |
| 204 | 365 | 7   | 2 | 7 | 4 |
| 205 | 119 | 8   | 2 | 7 | 4 |
| 206 | 482 | 9   | 5 | 7 | 4 |
| 207 | 297 | 9   | 3 | 7 | 4 |
| 208 | 211 | 9   | 2 | 7 | 4 |
| 209 | 208 | 9   | 2 | 7 | 4 |
| 210 | 505 | 14  | 6 | 7 | 4 |
| 211 | 320 | 14  | 6 | 7 | 4 |
| 212 | 292 | 16  | 5 | 7 | 4 |
| 213 | 538 | 17  | 6 | 7 | 4 |
| 214 | 419 | 19  | 8 | 7 | 4 |
| 215 | 594 | 20  | 6 | 7 | 4 |
| 216 | 299 | 26  | 5 | 7 | 5 |
| 217 | 542 | 28  | 7 | 7 | 4 |
| 218 | 541 | 29  | 7 | 7 | 4 |
| 219 | 326 | 32  | 4 | 7 | 4 |
| 220 | 563 | 36  | 5 | 7 | 4 |
| 221 | 656 | 41  | 8 | 7 | 4 |
| 222 | 574 | 44  | 7 | 7 | 5 |
| 223 | 459 | 58  | 3 | 7 | 4 |
| 224 | 883 | 59  | 6 | 7 | 4 |



|     |     |    |    |   |   |
|-----|-----|----|----|---|---|
| 225 | 509 | 61 | 8  | 7 | 4 |
| 226 | 698 | 79 | 8  | 7 | 4 |
| 227 | 320 | 1  | 1  | 8 | 4 |
| 228 | 322 | 4  | 3  | 8 | 4 |
| 229 | 337 | 5  | 2  | 8 | 5 |
| 230 | 127 | 7  | 4  | 8 | 4 |
| 231 | 353 | 7  | 2  | 8 | 4 |
| 232 | 201 | 7  | 3  | 8 | 4 |
| 233 | 384 | 8  | 5  | 8 | 5 |
| 234 | 194 | 8  | 2  | 8 | 4 |
| 235 | 303 | 9  | 3  | 8 | 4 |
| 236 | 321 | 12 | 6  | 8 | 4 |
| 237 | 328 | 12 | 6  | 8 | 4 |
| 238 | 497 | 14 | 6  | 8 | 5 |
| 239 | 283 | 15 | 3  | 8 | 5 |
| 240 | 667 | 16 | 7  | 8 | 4 |
| 241 | 405 | 18 | 7  | 8 | 4 |
| 242 | 459 | 19 | 6  | 8 | 4 |
| 243 | 529 | 22 | 5  | 8 | 6 |
| 244 | 594 | 23 | 6  | 8 | 6 |
| 245 | 244 | 24 | 8  | 8 | 6 |
| 246 | 467 | 38 | 9  | 8 | 4 |
| 247 | 359 | 41 | 6  | 8 | 6 |
| 248 | 303 | 46 | 7  | 8 | 5 |
| 249 | 522 | 54 | 9  | 8 | 4 |
| 250 | 611 | 59 | 8  | 8 | 4 |
| 251 | 356 | 2  | 2  | 9 | 4 |
| 252 | 331 | 5  | 3  | 9 | 5 |
| 253 | 348 | 7  | 3  | 9 | 4 |
| 254 | 389 | 9  | 5  | 9 | 4 |
| 255 | 398 | 10 | 4  | 9 | 7 |
| 256 | 442 | 11 | 5  | 9 | 4 |
| 257 | 479 | 14 | 6  | 9 | 4 |
| 258 | 311 | 15 | 5  | 9 | 4 |
| 259 | 324 | 16 | 6  | 9 | 6 |
| 260 | 189 | 16 | 4  | 9 | 5 |
| 261 | 641 | 18 | 5  | 9 | 4 |
| 262 | 403 | 26 | 7  | 9 | 4 |
| 263 | 454 | 26 | 6  | 9 | 5 |
| 264 | 472 | 35 | 6  | 9 | 4 |
| 265 | 718 | 39 | 10 | 9 | 4 |

|     |     |     |    |    |   |
|-----|-----|-----|----|----|---|
| 266 | 919 | 40  | 7  | 9  | 4 |
| 267 | 328 | 47  | 6  | 9  | 6 |
| 268 | 987 | 102 | 11 | 9  | 7 |
| 269 | 442 | 5   | 4  | 10 | 5 |
| 270 | 332 | 5   | 4  | 10 | 4 |
| 271 | 375 | 10  | 4  | 10 | 5 |
| 272 | 569 | 12  | 4  | 10 | 4 |
| 273 | 485 | 13  | 7  | 10 | 5 |
| 274 | 334 | 25  | 5  | 10 | 4 |
| 275 | 611 | 26  | 3  | 10 | 4 |
| 276 | 691 | 28  | 6  | 10 | 7 |
| 277 | 384 | 29  | 6  | 10 | 5 |
| 278 | 760 | 49  | 5  | 10 | 6 |
| 279 | 646 | 81  | 6  | 10 | 4 |
| 280 | 699 | 97  | 7  | 10 | 5 |
| 281 | 376 | 11  | 5  | 11 | 4 |
| 282 | 398 | 14  | 8  | 11 | 4 |
| 283 | 607 | 26  | 7  | 11 | 4 |
| 284 | 567 | 30  | 8  | 11 | 4 |
| 285 | 702 | 32  | 5  | 12 | 7 |

Table S3 PAINS substructures that are prone to the set of 13 SPA assays. Category name and definition are directly taken from Table S6-S8 of the original PAINS publication.<sup>1</sup>

| PAINS Rules                  | hit rate | # of times active | # of time tested |
|------------------------------|----------|-------------------|------------------|
| <i>het_pyridiniums_A(39)</i> | 0.81     | 35                | 43               |
| <i>amino_acridine_A(46)</i>  | 0.54     | 38                | 70               |
| <i>azo_A(324)</i>            | 0.35     | 42                | 120              |
| <i>quinone_A(370)</i>        | 0.35     | 54                | 156              |
| <i>ene_cyano_B(7)</i>        | 0.33     | 11                | 33               |
| <i>pyrrole_E(5)</i>          | 0.31     | 16                | 52               |
| <i>ene_one_hal(17)</i>       | 0.26     | 10                | 38               |
| <i>hzone_phenol_B(215)</i>   | 0.25     | 13                | 53               |
| <i>ene_five_het_C(85)</i>    | 0.24     | 9                 | 37               |
| <i>anil_alk_ene(51)</i>      | 0.24     | 82                | 341              |
| <i>ene_rhod_A(235)</i>       | 0.23     | 92                | 397              |

#### References:

1. Baell, J. B., & Holloway, G. A. New substructure filters for removal of pan assay interference compounds (PAINS) from screening libraries and for their exclusion in bioassays. *J. of Med. Chem.*, **2010**, 53(7), 2719–40.
